# Supplementary material
Source: PubMed Central journal article supplement (PMC4788059)
Supplement: luoj766568.w1_default.pdf [file luoj766568.w1_default.pdf]

## **SHORT LIST OF WOMEN'S HEALTH INITIATIVE INVESTIGATORS**

**Program Office:** (National Heart, Lung, and Blood Institute, Bethesda, Maryland) Elizabeth Nabel, Jacques Rossouw, Shari Ludlam, Joan McGowan, Leslie Ford, and Nancy Geller.

**Clinical Coordinating Center:** (Fred Hutchinson Cancer Research Center, Seattle, WA) Ross Prentice, Garnet Anderson, Andrea LaCroix, Charles L. Kooperberg, Ruth E. Patterson, Anne McTiernan; (Medical Research Labs, Highland Heights, KY) Evan Stein; (University of California at San Francisco, San Francisco, CA) Steven Cummings.

**Clinical Centers:** (Albert Einstein College of Medicine, Bronx, NY) Sylvia Wassertheil-Smoller; (Baylor College of Medicine, Houston, TX) Aleksandar Rajkovic; (Brigham and Women's Hospital, Harvard Medical School, Boston, MA) JoAnn E. Manson; (Brown University, Providence, RI) Charles B. Eaton; (Emory University, Atlanta, GA) Lawrence Phillips; (Fred Hutchinson Cancer Research Center, Seattle, WA) Shirley Beresford; (George Washington University Medical Center, Washington, DC) Lisa Martin; (Los Angeles Biomedical Research Institute at Harbor- UCLA Medical Center, Torrance, CA) Rowan Chlebowski; (Kaiser Permanente Center for Health Research, Portland, OR) Yvonne Michael; (Kaiser Permanente Division of Research, Oakland, CA) Bette Caan; (Medical College of Wisconsin, Milwaukee, WI) Jane Morley Kotchen; (MedStar Research Institute/Howard University, Washington, DC) Barbara V. Howard; (Northwestern University, Chicago/Evanston, IL) Linda Van Horn; (Rush Medical Center, Chicago, IL) Henry Black; (Stanford Prevention Research Center, Stanford, CA) Marcia L. Stefanick; (State University of New York at Stony Brook, Stony Brook, NY) Dorothy Lane; (The Ohio State University, Columbus, OH) Rebecca Jackson; (University of Alabama at Birmingham, Birmingham, AL) Cora E. Lewis; (University of Arizona, Tucson/Phoenix, AZ) Cynthia A Thomson; (University at Buffalo, Buffalo, NY) Jean Wactawski-Wende; (University of California at Davis, Sacramento, CA) John Robbins; (University of California at Irvine, CA) F. Allan

Hubbell; (University of California at Los Angeles, Los Angeles, CA) Lauren Nathan;  
(University of California at San Diego, LaJolla/Chula Vista, CA) Robert D. Langer;  
(University of Cincinnati, Cincinnati, OH) Margery Gass; (University of Florida,  
Gainesville/Jacksonville, FL) Marian Limacher; (University of Hawaii, Honolulu, HI) J.  
David Curb; (University of Iowa, Iowa City/Davenport, IA) Robert Wallace; (University of  
Massachusetts/Fallon Clinic, Worcester, MA) Judith Ockene; (University of Medicine and  
Dentistry of New Jersey, Newark, NJ) Norman Lasser; (University of Miami, Miami, FL)  
Mary Jo O'Sullivan; (University of Minnesota, Minneapolis, MN) Karen Margolis;  
(University of Nevada, Reno, NV) Robert Brunner; (University of North Carolina, Chapel  
Hill, NC) Gerardo Heiss; (University of Pittsburgh, Pittsburgh, PA) Lewis Kuller; (University  
of Tennessee Health Science Center, Memphis, TN) Karen C. Johnson; (University of Texas  
Health Science Center, San Antonio, TX) Robert Brzyski; (University of Wisconsin, Madison,  
WI) Gloria E. Sarto; (Wake Forest University School of Medicine, Winston-Salem, NC)  
Mara Vitolins; (Wayne State University School of Medicine/Hutzel Hospital, Detroit, MI)  
Michael Simon.

**Women's Health Initiative Memory Study:** (Wake Forest University School of Medicine,  
Winston-Salem, NC) Sally Shumaker.
